# Supplementary material for: Ambipolar transistors based on chloro-substituted tetraphenylpentacene
Source: Royal Society of Chemistry journal article supplement (doi:10.1039/c8tc06603e), 2019-01-01
Supplement: c8tc06603e1.pdf [file c8tc06603e1.pdf]

## Supporting Information

### Ambipolar transistors based on chloro-substituted tetraphenylpentacene

Ryonosuke Sato,<sup>\*a</sup> Shohei Eda,<sup>bc</sup> Haruki Sugiyama,<sup>de</sup> Hidehiro Uekusa,<sup>d</sup> Toshiyuki  
Hamura,<sup>\*b</sup> and Takehiko Mori<sup>\*a</sup>

<sup>a</sup> Department of Materials Science and Engineering, Tokyo Institute of Technology, O-okayama, Meguro-ku, Tokyo 152-8552, Japan. \*E-mail: sato.rah@m.titech.ac.jp, mori.t.ae@m.titech.ac.jp

<sup>b</sup> Department of Applied Chemistry and Environment, Kwansai Gakuin University, 2-1 Gakuen, Sanda, Hyogo 669-1337, Japan. \*E-mail: thamura@kwansei.ac.jp,

<sup>c</sup> Present address: RIKEN, 2-1, Hirosawa, Wako, Saitama 351-0198, Japan.

<sup>d</sup> Department of Chemistry, Tokyo Institute of Technology, O-okayama, Meguro-ku, Tokyo 152-8551, Japan.

<sup>e</sup> Present address: Research and Education Center for Natural Sciences, Keio University, 4-1-1 Hiyoshi, Kohoku-ku, Yokohama, Kanagawa 223-8521, Japan.

#### General Experimental Procedures

All experiments dealing with air- and moisture-sensitive compounds were conducted under an atmosphere of dry argon. Toluene (anhydrous; Wako Pure Chemical Industries, Ltd.), THF (anhydrous; Wako Pure Chemical Industries, Ltd.) and chlorobenzene (anhydrous; Sigma-Aldrich Co. LLC) were used as received.

For thin-layer chromatography (TLC) analysis, Merck pre-coated plates (silica gel 60 F<sub>254</sub>, Art 5715, 0.25 mm) were used. For flash column chromatography, silica gel 60 N (spherical, neutral, 63–210 µm) from Kanto Chemical was used.

<sup>1</sup>H NMR and <sup>13</sup>C NMR were measured on a JEOL JNM ECA-400, a JEOL JNM ECX-500II, or a JEOL JNM ECZ-500R spectrometer. Chemical shifts (δ) are expressed in parts per million (ppm) downfield from internal standard (tetramethylsilane, 0.00 ppm) in CDCl<sub>3</sub> and coupling constants are reported as hertz (Hz). Splitting patterns are indicated as follows; br, broad; s, singlet; d, doublet; t, triplet; q, quartet; m, multiplet. Attenuated Total Reflectance Fourier Transformation Infrared (ATR-FTIR) spectra were recorded on a JASCO FT/IR-4200 infrared spectrometer. High resolution mass spectra were obtained with a JEOL The AccuTOF LC-plus JMS-T100LP or a JEOL JMS 700 spectrometer. Melting points (Mp) were measured on a Yanako MP-S3 instrument or a MPA100 OptiMelt Automated Melting Point System from Stanford research and are uncorrected.

## Synthesis of halogen-substituted tetraphenylpentacenes

**Scheme S1.** Successive [4+2] cycloadditions of haloarynes with isobenzofurans

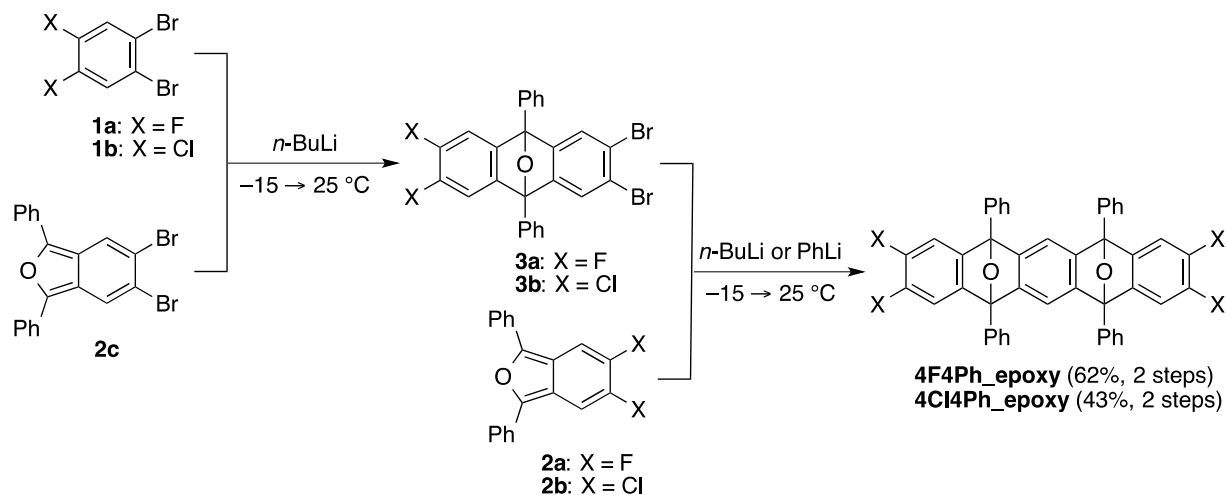

### One-pot synthesis of diepoxypentacene **4F4Ph\_epoxy**:

To a solution of 1,2-dibromo-4,5-difluorobenzene (**1a**) (146 mg, 0.539 mmol) and 5,6-dibromo-1,3-diphenylisobenzofuran (**2c**) (271 mg, 0.633 mmol) in toluene (2.2 mL) was added *n*-BuLi (1.59 M in *n*-hexane, 0.42 mL, 0.67 mmol) at  $-15^{\circ}\text{C}$ . After warmed to  $25^{\circ}\text{C}$  and stirred for 10 min, 5,6-difluoro-1,3-diphenylisobenzofuran (**2a**) (322 mg, 1.05 mmol) in toluene (3.5 mL) was added to the mixture at  $-15^{\circ}\text{C}$ , to which was slowly added PhLi (1.06 M in cyclohexane–Et<sub>2</sub>O, 1.3 mL, 1.4 mmol) at same temperature. After warmed to  $25^{\circ}\text{C}$ , the reaction was stopped by adding water. The products were extracted with EtOAc (X3), and the combined organic extracts were washed with brine, dried (Na<sub>2</sub>SO<sub>4</sub>), and concentrated *in vacuo*. The residue was purified by silica-gel flash column chromatography (hexane/toluene = 8/2  $\rightarrow$  7/3  $\rightarrow$  6/4) to give diepoxypentacene **4F4Ph\_epoxy** as a mixture of diastereomers (228 mg, 61.6%, less polar/more polar = 52/48), which were separated by silica-gel flash column chromatography (hexane/toluene = 8/2  $\rightarrow$  7/3  $\rightarrow$  6/4  $\rightarrow$  5/5), affording less polar **4F4Ph\_epoxy** and more polar **4F4Ph\_epoxy**.

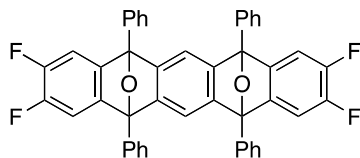

diepoxypentacene **4F4Ph\_epoxy** (less polar)

R<sub>f</sub> 0.43 (hexane/CHCl<sub>3</sub>/Et<sub>2</sub>O = 90/5/5);

Mp 330.3–330.9 °C (hexane/CHCl<sub>3</sub>);

<sup>1</sup>H NMR (400 MHz, CDCl<sub>3</sub>,  $\delta$ ) 7.08 (dd, 4H,  $J_1 = J_2 = 7.8$  Hz), 7.32 (s, 2H), 7.51 (dd, 4H,  $J_1 = J_2 = 7.3$  Hz), 7.59 (dd, 8H,  $J_1 = J_2 = 7.3$  Hz), 7.78 (d, 8H,  $J = 7.3$  Hz);

<sup>13</sup>C NMR (100 MHz, CDCl<sub>3</sub>,  $\delta$ ) 90.3, 110.9 (dd,  $J_1 = 7.7$  Hz,  $J_2 = 14.4$  Hz), 113.7, 126.4, 128.8,

129.1, 133.8, 146.3 (dd,  $J_1 = J_2 = 3.8$  Hz), 147.9 (dd,  $J_1 = 15.3$  Hz,  $J_2 = 250.2$  Hz), 149.3;  
 IR (ATR) 3061, 3035, 2855, 1617, 1500, 1474, 1450, 1437, 1352, 1308, 1238, 1173, 1121, 1109, 1053, 1030, 1002, 982, 968, 889, 876, 781, 767, 741, 725, 700  $\text{cm}^{-1}$ ;  
 HRMS (ESI)  $m/z$  709.1787 (709.1767 calcd for  $\text{C}_{46}\text{H}_{26}\text{F}_4\text{NaO}_2$   $[\text{M}+\text{Na}]^+$ ).  
 diepoxypentacene **4F4Ph\_epoxy** (more polar)  
 Rf 0.26 (hexane/ $\text{CHCl}_3$ / $\text{Et}_2\text{O}$  = 90/5/5);  
 Mp 339.3–340.1 °C (hexane/ $\text{CHCl}_3$ );  
 $^1\text{H}$  NMR (400 MHz,  $\text{CDCl}_3$ ,  $\delta$ ) 7.12 (dd, 4H,  $J_1 = J_2 = 7.8$  Hz), 7.29 (s, 2H), 7.47 (m, 4H,  $J_1 = J_2 = 7.3$  Hz), 7.55 (dd, 8H,  $J_1 = J_2 = 7.3$  Hz), 7.77 (dd, 8H,  $J = 7.3$  Hz);  
 $^{13}\text{C}$  NMR (100 MHz,  $\text{CDCl}_3$ ,  $\delta$ ) 90.3, 111.0 (dd,  $J_1 = 7.7$  Hz,  $J_2 = 14.4$  Hz), 113.4, 126.3, 128.7, 129.0, 133.9, 146.7 (dd,  $J_1 = J_2 = 3.9$  Hz), 147.8 (dd,  $J_1 = 15.3$  Hz,  $J_2 = 250.2$  Hz), 149.2;  
 IR (ATR) 3036, 3010, 1621, 1474, 1449, 1431, 1374, 1310, 1243, 1214, 1185, 1177, 1123, 1107, 1054, 1029, 999, 984, 905, 880, 866, 780, 746  $\text{cm}^{-1}$ ;  
 HRMS (ESI)  $m/z$  709.1782 (709.1767 calcd for  $\text{C}_{46}\text{H}_{26}\text{F}_4\text{NaO}_2$   $[\text{M}+\text{Na}]^+$ ).

*One-pot synthesis of diepoxypentacene 4Cl4Ph\_epoxy:*

To a mixture of 1,2-dibromo-4,5-dichlorobenzene (**1b**) (104 mg, 0.341 mmol) and 5,6-dibromo-1,3-diphenylisobenzofuran (**2c**) (154 mg, 0.360 mmol) in chlorobenzene (3.0 mL) was added *n*-BuLi (1.60 M in *n*-hexane, 0.26 mL, 0.42 mmol) at  $-15$  °C. After being warmed to  $25$  °C and stirred for 10 min, 5,6-dichloro-1,3-diphenylisobenzofuran (**2b**) (180 mg, 0.531 mmol) in chlorobenzene (3.0 mL) was added to the mixture at  $-15$  °C, to which was slowly *n*-BuLi (1.60 M in *n*-hexane, 0.45 mL, 0.72 mmol) at same temperature. After being warmed to  $25$  °C, the reaction was stopped by adding water. The products were extracted with EtOAc (X3), and the combined organic extracts were washed with brine, dried ( $\text{Na}_2\text{SO}_4$ ), and concentrated *in vacuo*. The residue was purified by silica-gel open column chromatography (hexane/ $\text{CH}_2\text{Cl}_2$ / $\text{Et}_2\text{O}$  = 96/3/1  $\rightarrow$  92/6/2) to give cycloadduct **4Cl4Ph\_epoxy** as a mixture of diastereomers (111 mg, 43.4%, less polar/more polar = 52/48), which were separated by silica-gel flash column chromatography (hexane/ $\text{CH}_2\text{Cl}_2$ / $\text{Et}_2\text{O}$  = 96/3/1  $\rightarrow$  92/6/2), affording less polar **4Cl4Ph\_epoxy** and more polar **4Cl4Ph\_epoxy**.

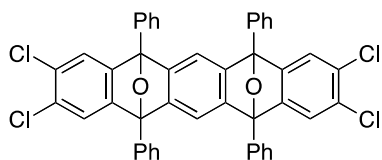

diepoxypentacene **4Cl4Ph\_epoxy** (less polar)  
 Rf 0.43 (hexane/ $\text{CH}_2\text{Cl}_2$ / $\text{Et}_2\text{O}$  = 92/6/2, X2);  
 Mp 424.1–425.0 °C (MeOH/ $\text{CHCl}_3$ );  
 $^1\text{H}$  NMR (500 MHz,  $\text{CDCl}_3$ ,  $\delta$ ) 7.31 (s, 4H), 7.33 (s, 2H), 7.52 (dd, 4H,  $J_1 = J_2 = 7.4$  Hz), 7.60 (dd, 8H,  $J_1 = J_2 = 7.4$  Hz), 7.77–7.80 (m, 8H);  
 $^{13}\text{C}$  NMR ( $\text{CDCl}_3$ ,  $\delta$ ) 90.2, 114.0, 122.7, 126.4, 128.8, 129.1, 129.6, 133.5, 149.1, 150.2;  
 IR (ATR) 3035, 1608, 1541, 1506, 1448, 1419, 1339, 1306, 1181, 1146, 1114, 984, 882, 862,

799, 748  $\text{cm}^{-1}$ ;

HRMS (ESI)  $m/z$  773.0567 (773.0585 calcd for  $\text{C}_{46}\text{H}_{26}\text{Cl}_4\text{NaO}_2$   $[\text{M}+\text{Na}]^+$ ).

diepoxypentacene **4Cl4Ph\_epoxy** (more polar)

Rf 0.28 (hexane/ $\text{CH}_2\text{Cl}_2$ / $\text{Et}_2\text{O}$  = 92/6/2, X2);

Mp 353.4–354.2  $^\circ\text{C}$  ( $\text{MeOH}/\text{CHCl}_3$ );

$^1\text{H}$  NMR (500 MHz,  $\text{CDCl}_3$ ,  $\delta$ ) 7.31 (s, 2H), 7.35 (s, 4H), 7.48 (dd, 4H,  $J_1 = J_2 = 7.5$  Hz), 7.57 (dd, 8H,  $J_1 = J_2 = 7.5$  Hz), 7.75–7.78 (m, 8H);

$^{13}\text{C}$  NMR (125 MHz,  $\text{CDCl}_3$ ,  $\delta$ ) 90.2, 113.7, 122.8, 126.3, 128.7, 129.0, 129.6, 133.6, 148.9, 150.5;

IR (ATR) 3034, 1607, 1541, 1498, 1449, 1424, 1354, 1306, 1212, 1155, 1111, 999, 983, 878, 805, 750  $\text{cm}^{-1}$ ;

HRMS (ESI)  $m/z$  773.0576 (773.0585 calcd for  $\text{C}_{46}\text{H}_{26}\text{Cl}_4\text{NaO}_2$   $[\text{M}+\text{Na}]^+$ ).

**Scheme S2.** Aromatization of diepoxypentacenes

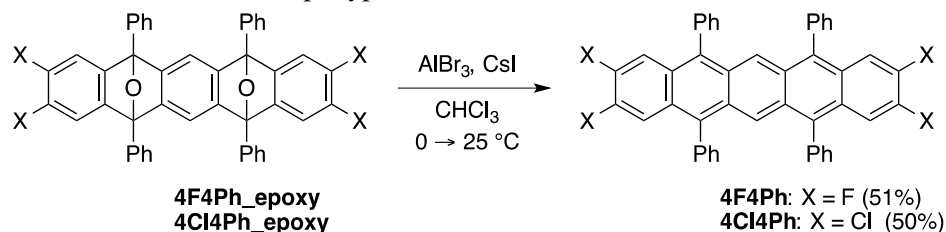

*Synthesis of pentacene **4F4Ph**:*

All manipulations were carried out with a stringent exclusion of air and light. To a mixture of diepoxypentacene **4F4Ph\_epoxy** (28.3 mg, 41.2  $\mu\text{mol}$ ) and CsI (86.6 mg, 0.334 mmol) in  $\text{CHCl}_3$  (2.0 mL) was added  $\text{AlBr}_3$  (1.0 M in dibromomethane, 0.10 mL, 0.11 mmol) at 0  $^\circ\text{C}$ , and the reaction was warmed to 25  $^\circ\text{C}$ . After 5 h, the reaction was stopped by adding sat. aq.  $\text{NaHCO}_3$ . The aqueous layer was removed with a syringe, and the products were successively washed with sat. aq.  $\text{NaHCO}_3$  and brine. After removing the aqueous layer, the residue was directly purified by silica-gel column chromatography (hexane/ $\text{CH}_2\text{Cl}_2$  = 7/3) in argon atmosphere (Figure 1) to give **4F4Ph** (14.0 mg, 51.9%) as a blue solid.

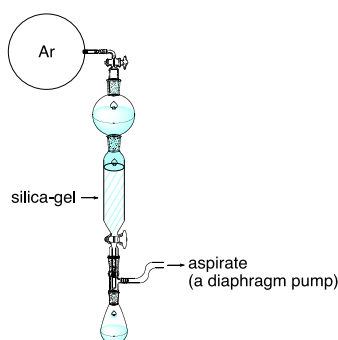

**Figure S1.** Silica-gel column chromatography in argon atmosphere

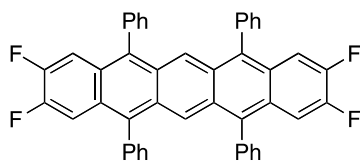

pentacene **4F4Ph**

Mp 252.4–253.9 °C (hexane/CHCl<sub>3</sub>);

<sup>1</sup>H NMR (500 MHz, CDCl<sub>3</sub>, δ) 7.29–7.32 (m, 8H), 7.33 (dd, 4H, *J*<sub>1</sub> = *J*<sub>2</sub> = 10.5 Hz) 7.42–7.46 (m, 12H), 8.12 (s, 2H);

<sup>13</sup>C NMR (125 MHz, CDCl<sub>3</sub>, δ) 111.4 (dd, *J*<sub>1</sub> = 4.8 Hz, *J*<sub>2</sub> = 14.4 Hz), 125.7, 126.5, 127.6, 128.4, 128.7, 130.9, 137.0, 137.9, 149.9 (dd, *J*<sub>1</sub> = 20.4 Hz, *J*<sub>2</sub> = 255.5 Hz);

IR (ATR) 3053, 1599, 1555, 1475, 1441, 1378, 1293, 1237, 1137, 1074, 1028, 990, 877, 795, 753 cm<sup>-1</sup>;

HRMS (ESI) *m/z* 654.1985 (654.1971 calcd for C<sub>46</sub>H<sub>26</sub>F<sub>4</sub>, M<sup>+</sup>).

*Synthesis of pentacene 4Cl4Ph:*

All manipulations were carried out with a stringent exclusion of air and light. To a mixture of diepoxypentacene **4Cl4Ph\_epoxy** (28.2 mg, 37.5 μmol) and CsI (78.1 mg, 0.301 mmol) in CHCl<sub>3</sub> (1.0 mL) was added AlBr<sub>3</sub> (1.0 M in dibromomethane, 90 μL, 90 μmol) at 0 °C, and the reaction was warmed to room temperature. After 18 h, the reaction was stopped by adding sat. aq. NaHCO<sub>3</sub>. The aqueous layer was removed with a syringe, and the products were washed again with sat. aq. NaHCO<sub>3</sub>. After removing the upper layer, the product was washed by brine in reactor vessel. After removing the aqueous layer, the residue was directly purified by silica-gel column chromatography (hexane/CH<sub>2</sub>Cl<sub>2</sub> = 8/2) in argon atmosphere to give **4Cl4Ph** (13.5 mg, 49.9%) as a blue solid.

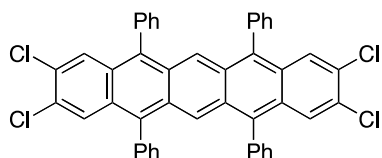

pentacene **4Cl4Ph**

Mp 341.9–342.5 °C (MeOH/CHCl<sub>3</sub>);

<sup>1</sup>H NMR (500 MHz, CDCl<sub>3</sub>, δ) 7.29–7.31 (m, 8H), 7.43–7.46 (m, 12H), 7.77 (s, 4H), 8.12 (s, 2H);

<sup>13</sup>C NMR (125 MHz, CDCl<sub>3</sub>, δ) 126.7, 127.7, 127.9, 128.4, 129.2, 129.5, 131.0, 137.0, 137.4;

IR (ATR) 3021, 1591, 1494, 1441, 1421, 1390, 1375, 1176, 1111, 1072, 987, 903, 886, 754, 731 cm<sup>-1</sup>;

HRMS (ESI) *m/z* 718.0803 (718.0789 calcd for C<sub>46</sub>H<sub>26</sub>Cl<sub>4</sub>, M<sup>+</sup>).

**Scheme S3. Synthesis of pentacene 4Br4Ph**

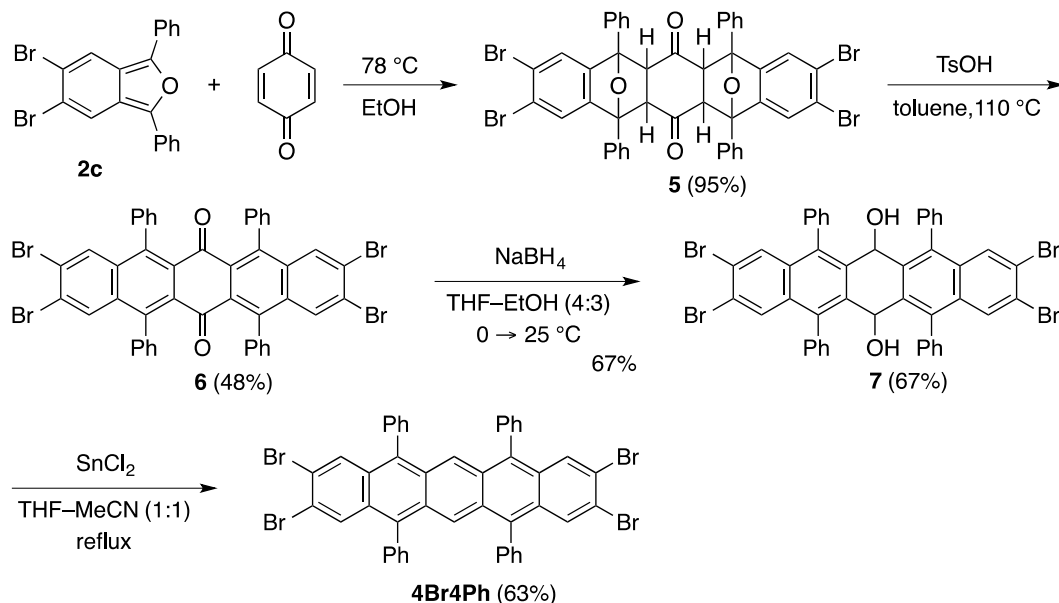

*Synthesis of cycloadduct 5:*

A mixture of isobenzofuran **2c** (642 mg, 1.50 mmol) and 1,4-benzoquinone (81.1 mg, 0.750 mmol) in EtOH (20 mL) was heated at 78 °C for 3 h. After being cooled to room temperature, the solvent was removed *in vacuo*. The residue was filtered and washed by hexane (X3) and MeOH (X3) to give essentially pure cycloadduct **5** (690 mg, 95.5%) as a white solid.

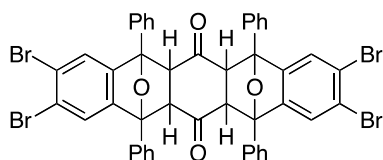

**cycloadduct 5**

Mp decomposed at 170 °C;

<sup>1</sup>H NMR (500 MHz, CDCl<sub>3</sub>, δ) 3.35 (s, 2H), 4.24 (s, 2H), 6.60 (d, 4H, *J* = 7.6 Hz), 7.12 (dd, 4H, *J* = 7.6 Hz), 7.15 (s, 2H), 7.27 (dd, 4H, *J* = 7.6 Hz), 7.41 (s, 2H), 7.63–7.66 (m, 6H), 7.73–7.77 (m, 4H);

<sup>13</sup>C NMR (125 MHz, CDCl<sub>3</sub>, δ) 57.8, 63.2, 88.8, 91.5, 123.0, 124.6, 124.7, 126.5, 127.8, 128.0, 128.1, 128.8, 129.1, 129.4, 132.7, 135.1, 146.4, 147.6, 203.8;

IR (ATR) 3063, 1714, 1605, 1496, 1448, 1355, 1287, 1213, 1177, 1089, 1004, 873, 750 cm<sup>-1</sup>;

HRMS (ESI) *m/z* 982.8606 (982.8619 calcd for C<sub>46</sub>H<sub>28</sub>Br<sub>4</sub>NaO<sub>4</sub>, [M+Na]<sup>+</sup>).

*Synthesis of pentacenequinone 6:*

A mixture of cycloadduct **5** (645 mg, 0.669 mmol) and TsOH (256 mg, 1.35 mmol) in toluene (7.0 mL) was heated at 110 °C for 12 h. After being cooled to 25 °C, the solvent was removed *in vacuo*. The residue was filtered and washed by MeOH (X3) to give essentially pure

pentacenequinone **6** (298 mg, 48.0%) as a yellow-brown solid.

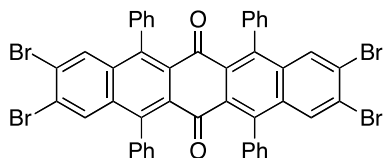

pentacenequinone **6**

Mp decomposed at 350 °C (MeOH/CHCl<sub>3</sub>);

<sup>1</sup>H NMR (400 MHz, CDCl<sub>3</sub>, δ) 7.18–7.22 (m, 8H), 7.37–7.41 (m, 12H), 7.84 (s, 4H);

<sup>13</sup>C NMR (100 MHz, CDCl<sub>3</sub>, δ) 125.9, 127.8, 128.2, 129.8, 132.7, 134.2, 135.9, 139.1, 187.7;

IR (ATR) 3058, 1696, 1599, 1493, 1442, 1373, 1327, 1180, 1073, 949, 889, 752 cm<sup>-1</sup>;

HRMS (ESI) *m/z* 946.8419 (946.8408 calcd for C<sub>46</sub>H<sub>24</sub>Br<sub>4</sub>NaO<sub>2</sub>, [M+Na]<sup>+</sup>).

#### Synthesis of diol **7**:

To a solution of pentacenequinone **6** (282 mg, 0.304 mmol) in THF–EtOH (4:3, 7.0 mL) was added NaBH<sub>4</sub> (57.8 mL, 1.55 mmol) at 0 °C, and the reaction was warmed to 25 °C. After 17 h, the reaction was stopped by adding water. The products were extracted with CHCl<sub>3</sub> (X3), and the combined organic extracts were washed with brine, dried (Na<sub>2</sub>SO<sub>4</sub>), and concentrated *in vacuo*. The residue was purified by silica-gel flash column chromatography (hexane/CHCl<sub>3</sub> = 4/6 → 3/7 → 2/8 → CHCl<sub>3</sub>) to give diol **7** (189 mg, 66.8%) as a white solid.

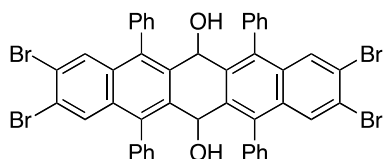

diol **7**

Mp decomposed at 250 °C (MeOH/CHCl<sub>3</sub>);

<sup>1</sup>H NMR (500 MHz, CDCl<sub>3</sub>, δ) 1.62 (d, 2H, *J* = 5.3 Hz), 5.98 (d, 2H, *J* = 5.3 Hz), 7.24–7.28 (m, 4H), 7.37–7.44 (m, 8H), 7.70 (s, 4H);

<sup>13</sup>C NMR (125 MHz, CDCl<sub>3</sub>, δ) 64.7, 122.9, 127.8, 128.3, 128.7, 129.2, 130.8, 131.1, 132.6, 133.3, 137.1, 138.6;

IR (ATR) 3572, 3053, 3006, 2963, 2924, 2851, 1600, 1554, 1494, 1458, 1440, 1404, 1329, 1308, 1216, 1105, 1072, 1029, 958, 906, 881, 753 cm<sup>-1</sup>;

HRMS (ESI) *m/z* 950.8720 (950.8721 calcd for C<sub>46</sub>H<sub>28</sub>Br<sub>4</sub>NaO<sub>2</sub>, [M+Na]<sup>+</sup>).

#### Synthesis of pentacene **4Br4Ph**:

All manipulations were carried out with a stringent exclusion of air and light. A mixture of diol **7** (170 mg, 0.182 mmol) and SnCl<sub>2</sub> (206 mg, 1.09 mmol) in THF–MeCN (1:1, 18 mL) was refluxed for 1 h. After cooled to 25 °C, the reaction mixture filtered through a Celite® pad and the solvent was removed *in vacuo*. The residue was filtered and washed by MeOH (X5) at 25 °C to give essentially pure **4Br4Ph** (103 mg, 63.2%) as a deep blue solid.

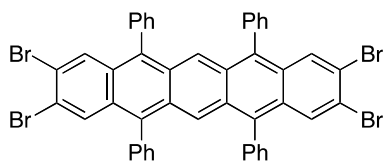

pentacene **4Br4Ph**

Mp 346.0–346.8 °C (MeOH/CHCl<sub>3</sub>);

<sup>1</sup>H NMR (500 MHz, CDCl<sub>3</sub>, δ) 7.28–7.31 (m, 8H), 7.43–7.46 (m, 12H), 7.97 (s, 4H), 8.15 (s, 2H);

<sup>13</sup>C NMR (125 MHz, CDCl<sub>3</sub>, δ) 121.6, 126.8, 127.7, 128.4, 128.5, 129.3, 131.0, 131.3, 137.1, 137.3;

IR (ATR) 3056, 1581, 1494, 1440, 1412, 1386, 1176, 1090, 956, 884, 752 cm<sup>-1</sup>;

HRMS (ESI) *m/z* 893.8769 (893.8768 calcd for C<sub>46</sub>H<sub>26</sub>Br<sub>4</sub>, M<sup>+</sup>).



## CV and UV-Vis measurements

Oxidation potentials were measured by cyclic voltammetry on an ALS620D electrochemical analyzer from BAS Inc., using degassed  $\text{CH}_2\text{Cl}_2$  as the solvent and  $n\text{-Bu}_4\text{NPF}_6$  as the supporting electrolyte. The working electrode was glassy carbon, the counter electrode was platinum wire, and the reference electrode was  $\text{Ag}/\text{AgNO}_3$  (0.01 M  $\text{AgNO}_3$  in MeCN with 0.1 M  $n\text{-Bu}_4\text{NClO}_4$ ). The scan rate is 100mV/s. Oxidation and reduction potentials were calculated from the half wave potentials, and HOMO and LUMO levels were calculated by assuming the energy level of ferrocene to be  $-4.8$  eV.<sup>37</sup>

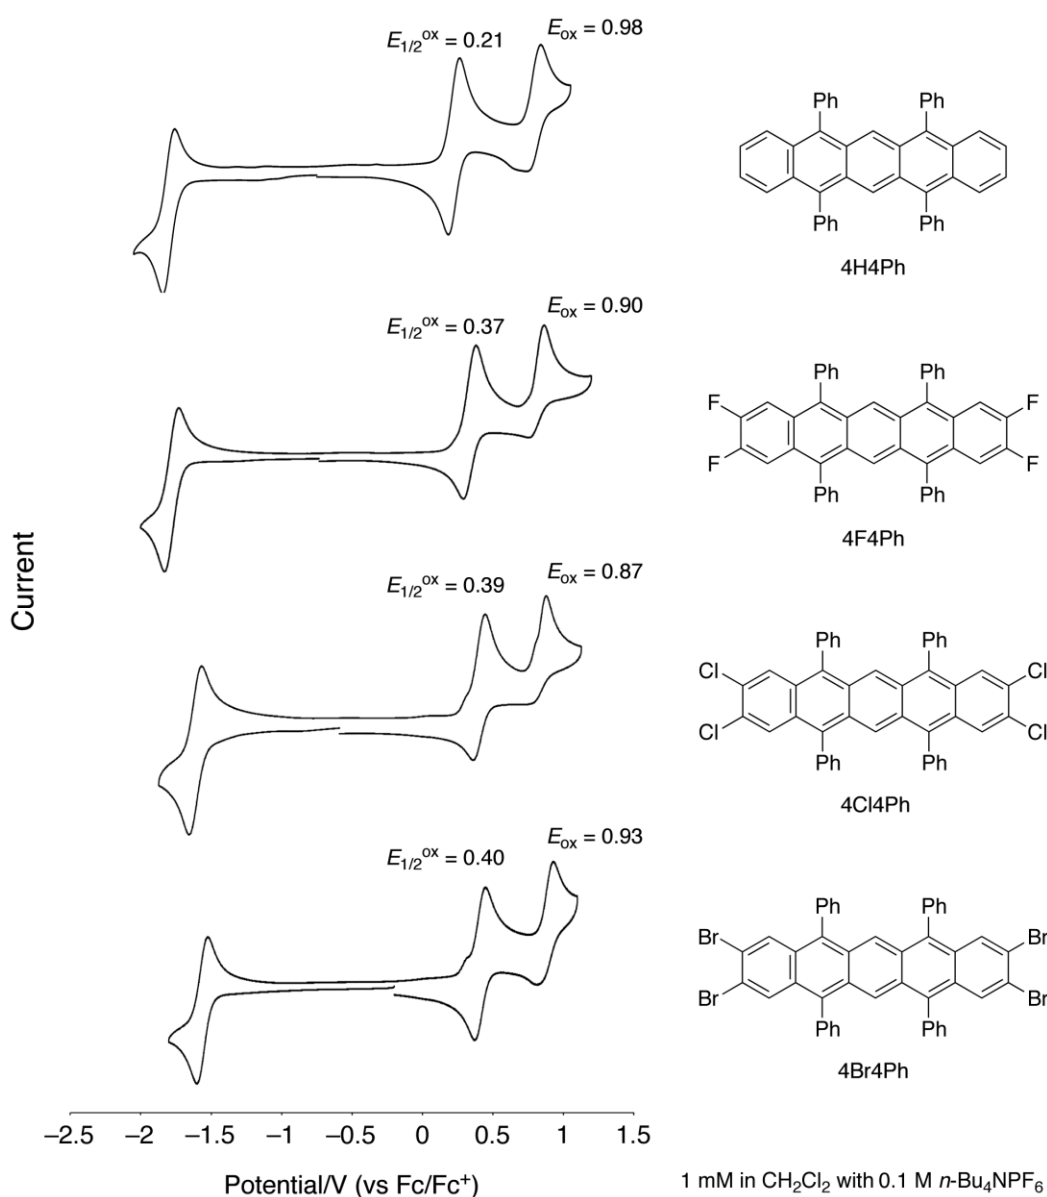

**Figure S2.** Cyclic voltammetry of **4X4Ph** (X = H, F, Cl, and Br).

Optical energy gaps were measured by UV-Vis spectra on a JASCO V-630 spectrophotometer using CH<sub>2</sub>Cl<sub>2</sub> as the solvent. The energy gaps are obtained from the absorption edges.

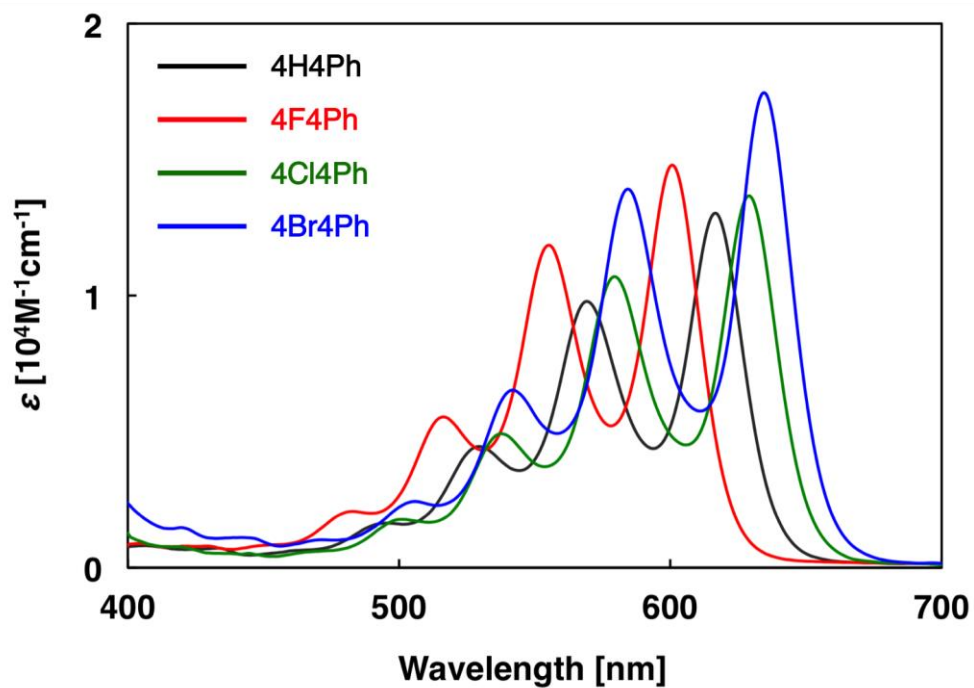

**Figure S3.** UV-Vis spectra of **4X4Ph** ( $X = \text{H, F, Cl, and Br}$ .  $10 \mu\text{M}$  in  $\text{CH}_2\text{Cl}_2$ ).

### Single crystal structure

The crystal data of **4X4Ph** ( $X = \text{F, Cl, and Br}$ ) are listed in Table 3.

The diffraction data of **4F4Ph** is collected by a RIGAKU R-AXIS RAPID-II IP Area Detector imaging plate with  $\text{CuK}\alpha$  radiation ( $\lambda = 1.54186 \text{ \AA}$ ). The structure was solved by direct methods (*SHELXS97*) and refined by the full-matrix least-squares on  $F^2$  (*SHELXL-2018/1*).<sup>S1</sup> CCDC number is 1887277.

The diffraction data of **4Cl4Ph** is collected by a R-AXIS RAPID IP Area Detector imaging plate with  $\text{MoK}\alpha$  radiation ( $\lambda = 0.71075 \text{ \AA}$ ). The structure was solved by direct methods (*SHELXT-2014/5*) and refined by the full-matrix least-squares on  $F^2$  (*SHELXL-2018/1*).<sup>S2</sup> CCDC number is 1887276.

The diffraction data of **4Br4Ph** is collected by a RIGAKU R-AXIS RAPID-II IP Area Detector imaging plate with  $\text{CuK}\alpha$  radiation ( $\lambda = 1.54186 \text{ \AA}$ ). The structure was solved by direct methods (*SHELXT-2014/5*) and refined by the full-matrix least-squares on  $F^2$  (*SHELXL-2018/1*). CCDC number is 1887275.

**Table S1. Torsion angles of four phenyl groups from the pentacene skeleton**

|                            | 1     | 2     | 3     | 4     |
|----------------------------|-------|-------|-------|-------|
| <b>4H4Ph</b> <sup>15</sup> | 76.9° | 67.3° | —     | —     |
| <b>4F4Ph</b>               | 60.4° | 66.0° | 65.9° | 58.7° |
| <b>4Cl4Ph</b>              | 65.2° | 72.9° | 70.5° | 62.0° |
| <b>4Br4Ph</b>              | 67.6° | 77.4° | 86.7° | 68.9° |

### Transfer integrals

In order to investigate intermolecular interactions, transfer integrals  $t = ES$  were calculated from the intermolecular overlaps  $S$  for HOMO ( $t_h$ ) and LUMO ( $t_e$ ).<sup>39</sup> The HOMO and LUMO were calculated by the MOPAC, AM1 molecular orbital calculation,<sup>S3,S4</sup> and  $E$  is assumed to be  $-10 \text{ eV}$ .

In addition, we have estimated transfer integrals using an energy-splitting approach by considering the energy levels of a diad.

$$t_{h[e]}^{\text{eff}} = (E_{H[L+1]} - E_{H-1[L]})/2$$

Here  $E_{H[L]}$  and  $E_{H-1[L+1]}$  are energies of the HOMO and HOMO-1 [LUMO and LUMO+1] levels taken from the neutral state of the intradimer and interdimer diads. These calculations were performed with the MOPAC, AM1 molecular orbital calculation.

Results in Fig. 3 are taken from Ref. 40, and adjusted to the present parameters.

4F4Ph *c*1

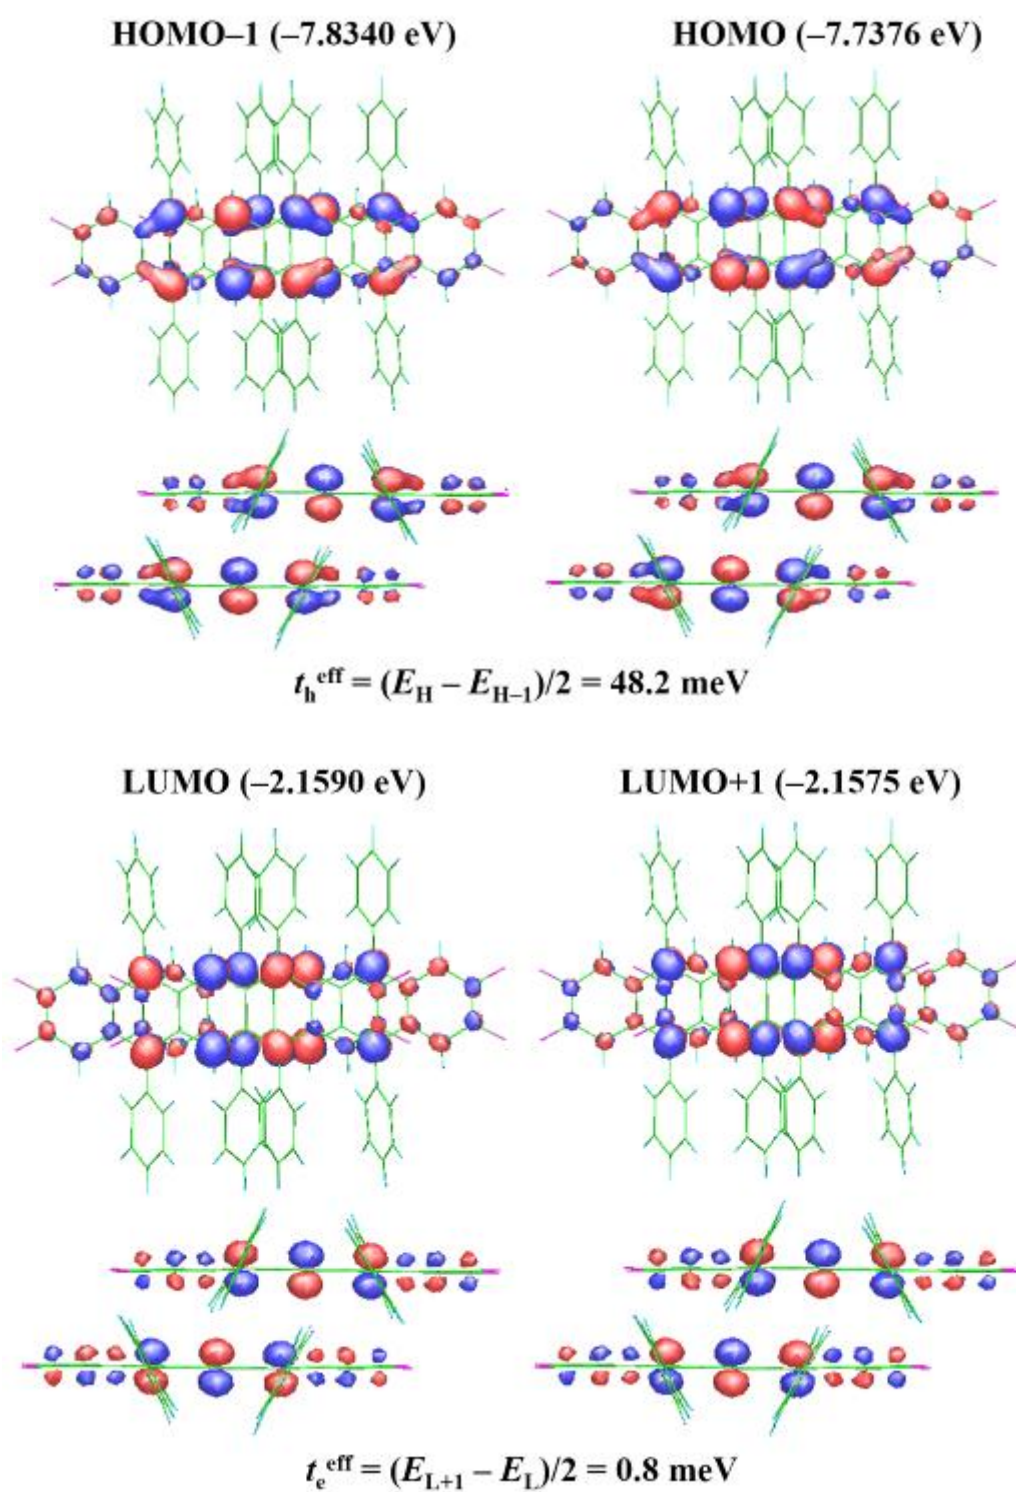

**Figure S4.** Energy-splitting estimation of the transfer integrals along the stacking direction in the **4F4Ph** intradimer interaction.

4F4Ph *c2*

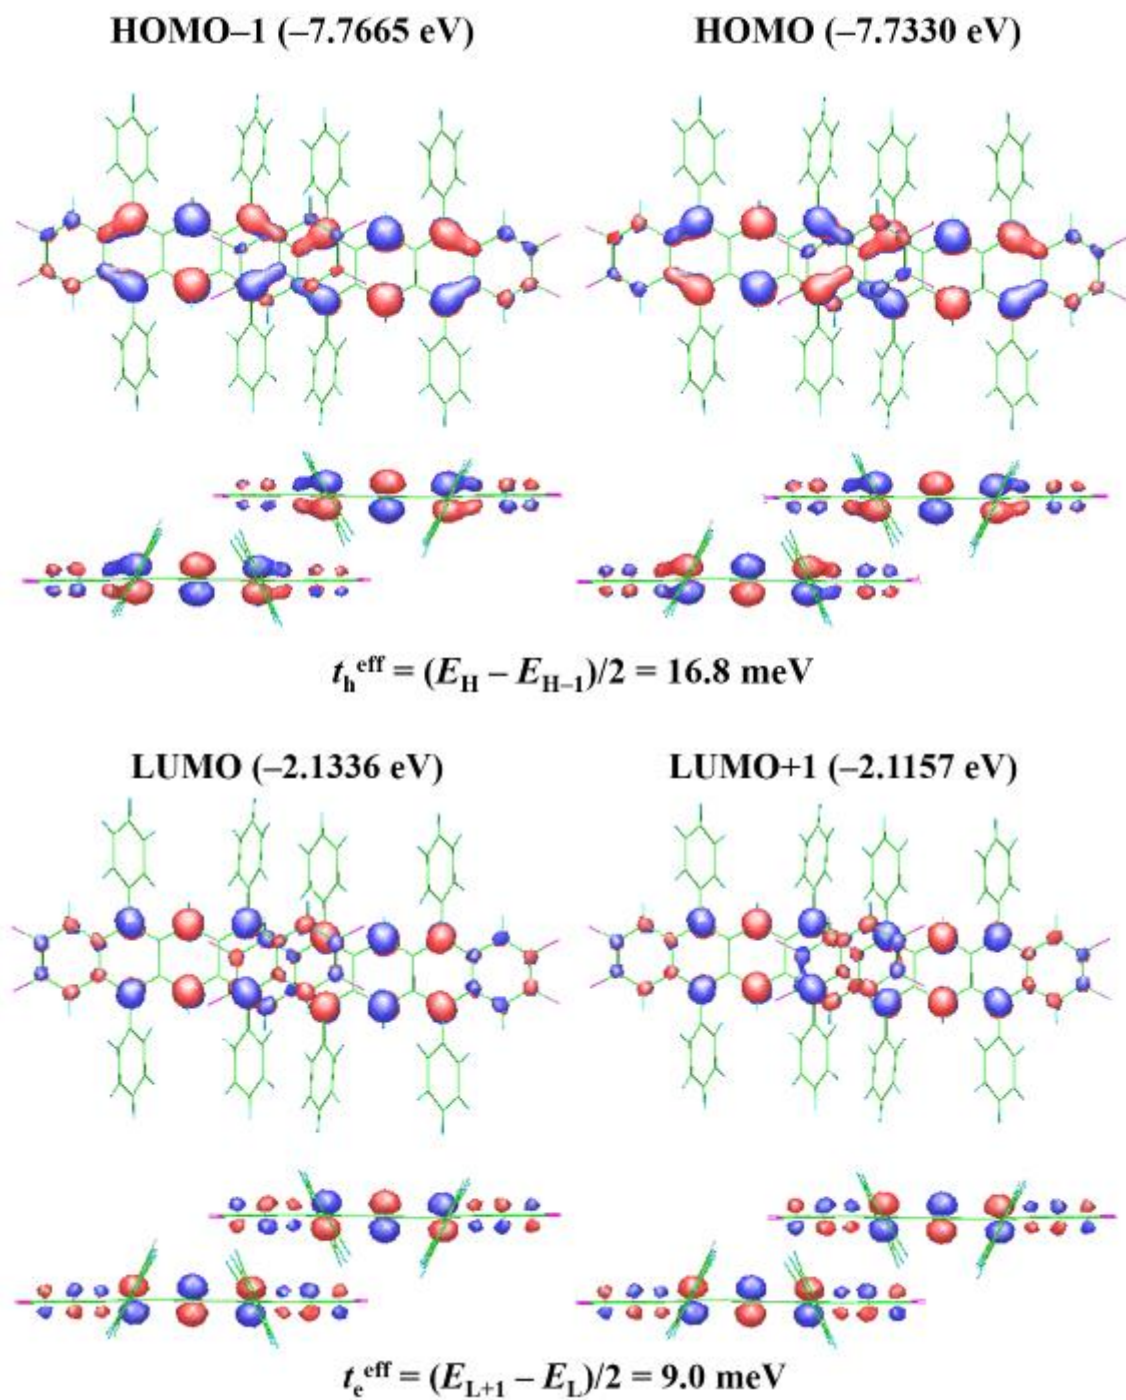

**Figure S5.** Energy-splitting estimation of the transfer integrals along the stacking direction in the **4F4Ph** interdimer interaction.



4Cl4Ph *c1*

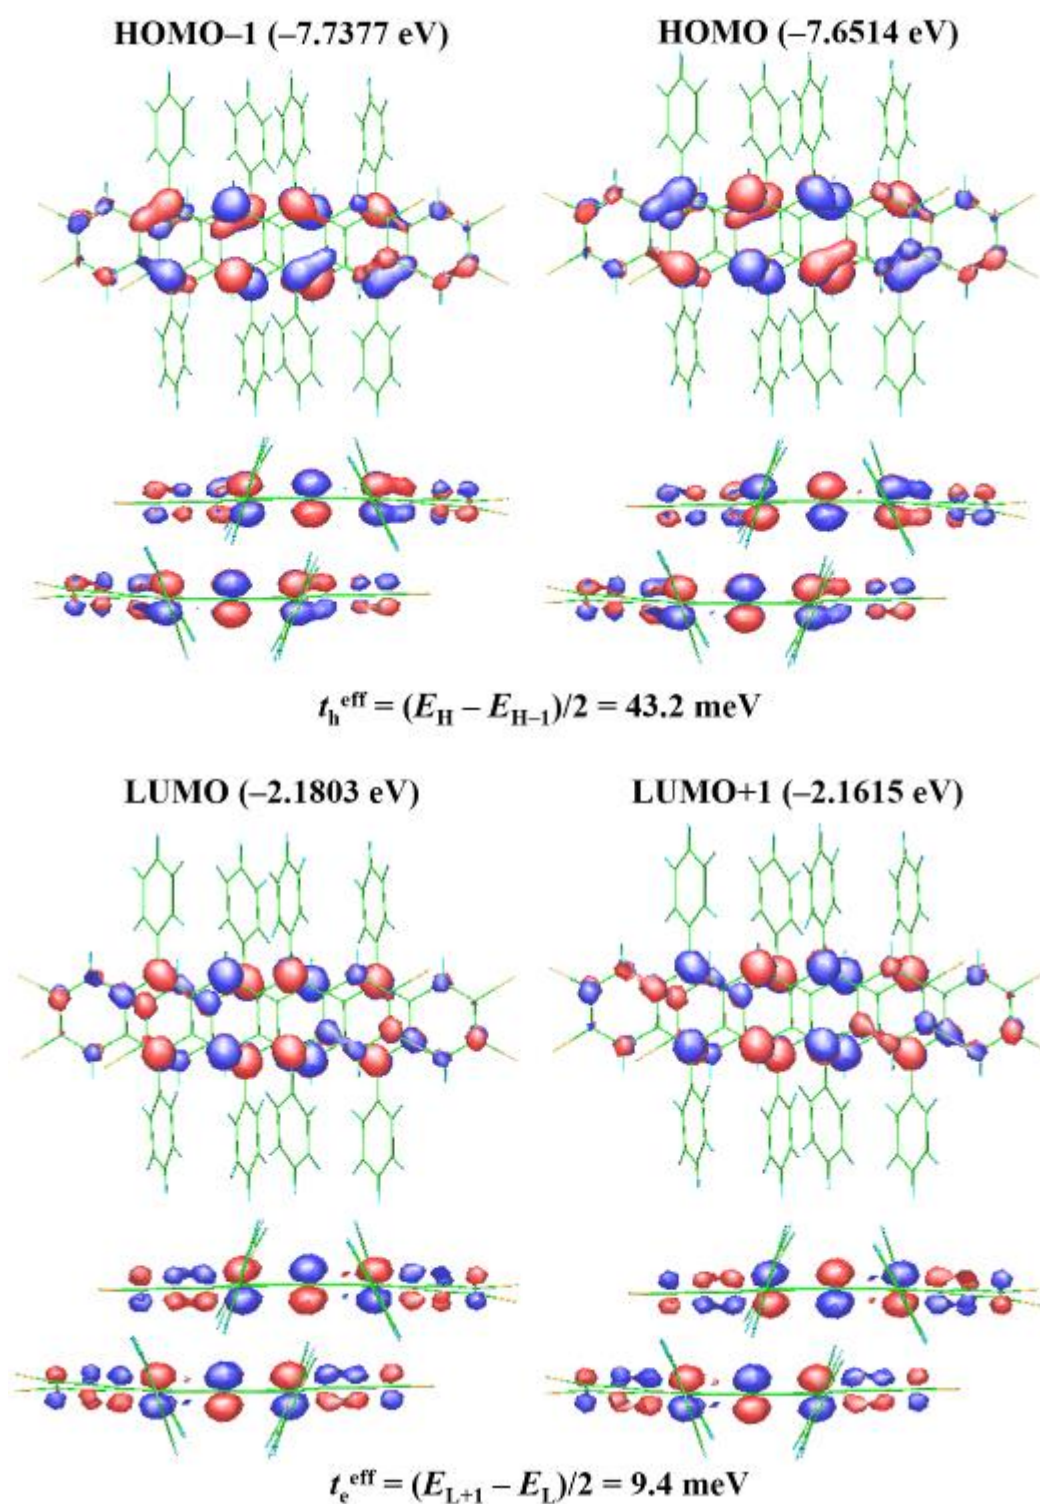

**Figure S6.** Energy-splitting estimation of the transfer integrals along the stacking direction in the **4Cl4Ph** intradimer interaction.

4Cl4Ph *c2*

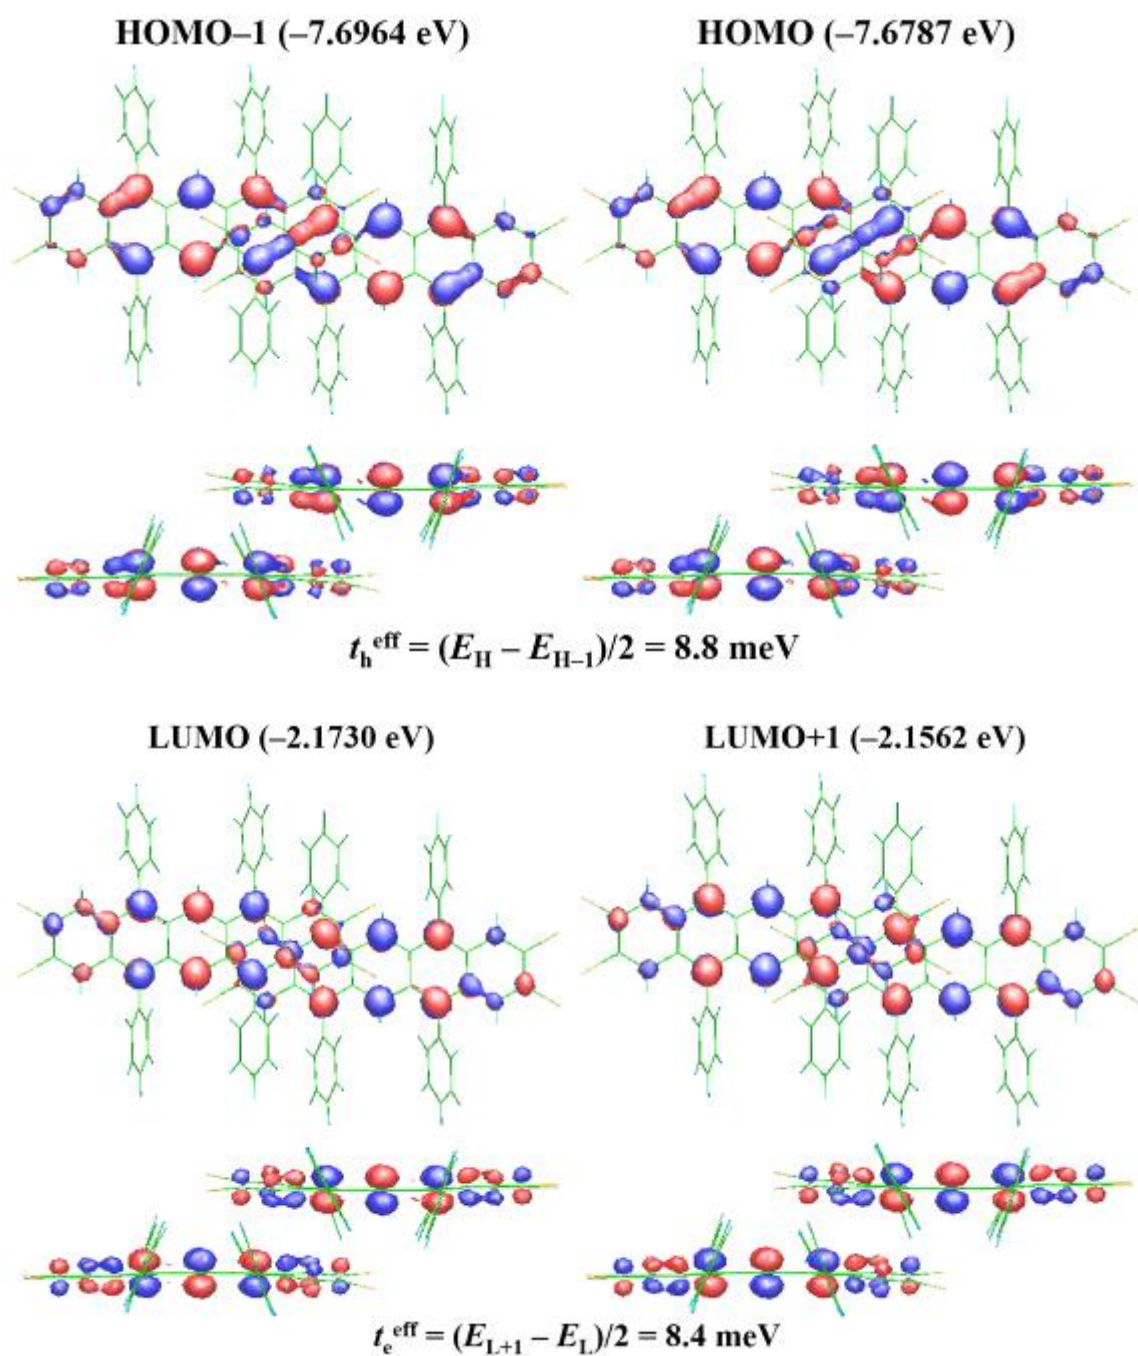

**Figure S7.** Energy-splitting estimation of the transfer integrals along the stacking direction in the **4Cl4Ph** interdimer interaction.

4Br4Ph c1

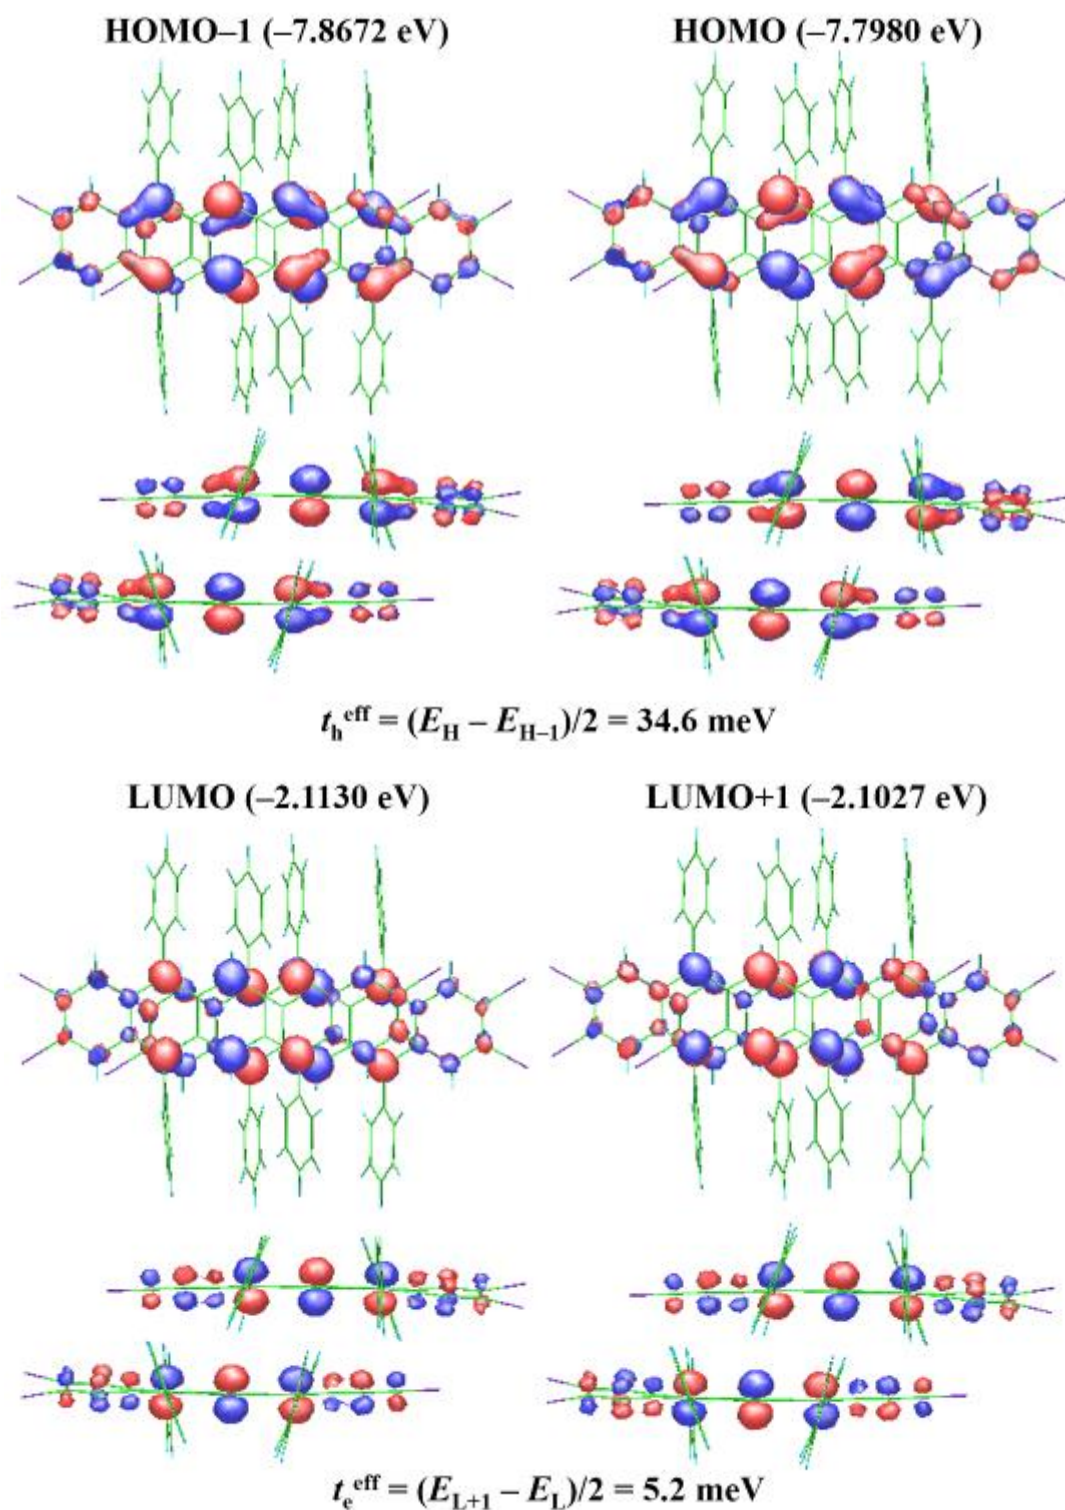

**Figure S8.** Energy-splitting estimation of the transfer integrals along the stacking direction in the **4Br4Ph** intradimer interaction.



4Br4Ph *c*2

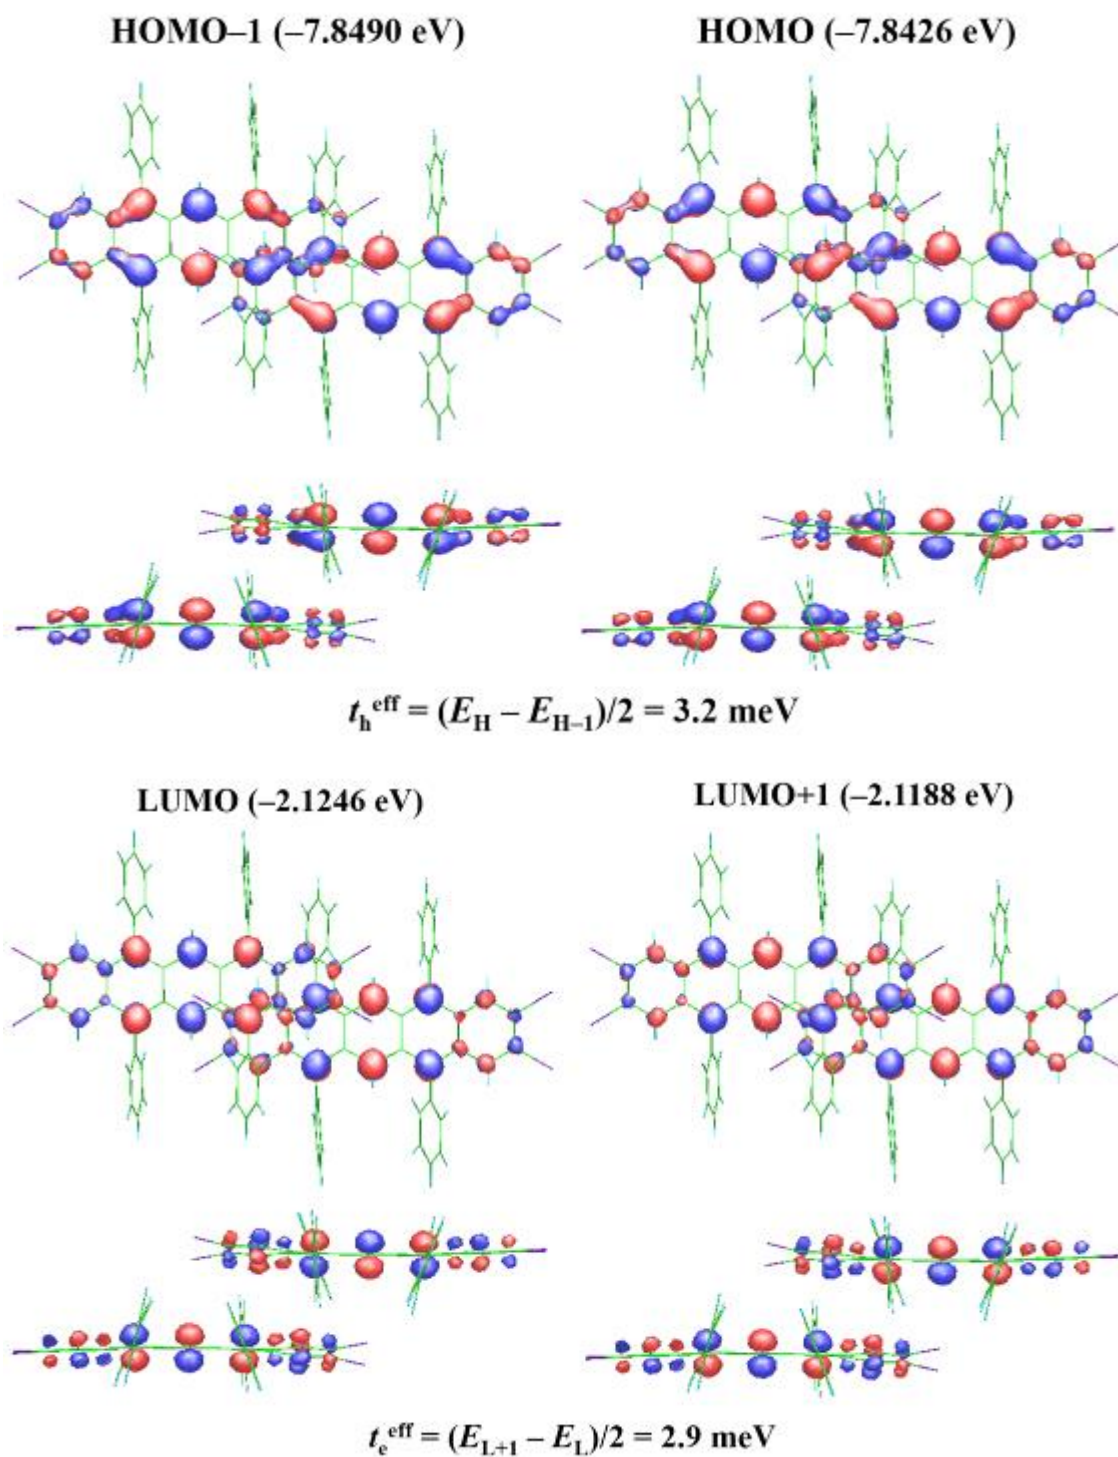

**Figure S9.** Energy-splitting estimation of the transfer integrals along the stacking direction in the **4Br4Ph** interdimer interaction.

## References

- S1 G. M. Sheldrick and IUCr, *Acta Crystallogr. Sect. C Struct. Chem.*, 2015, **71**, 3.
- S2 G. M. Sheldrick and IUCr, *Acta Crystallogr. Sect. A Found. Adv.*, 2015, **71**, 3.
- S3 M. J. S. Dewar, E. G. Zoebisch, E. F. Healy and J. J. P. Stewart, *J. Am. Chem. Soc.*, 1985, **107**, 3902.
- S4 M. J. S. Dewar and E. G. Zoebisch, *J. Mol. Struct. THEOCHEM*, 1988, **180**, 1.
